# Supplementary material for: Halo-phenyl based linear dipodal receptors for entrapment of anions/anionic associations within neutral non-cooperative self-assemblies
Source: Royal Society of Chemistry journal article supplement (doi:10.1039/c8ce01558a), 2018-10-30
Supplement: c8ce01558a1.pdf [file c8ce01558a1.pdf]

## **Electronic Supplementary Information**

### **Halo-phenyl based linear dipodal receptors for entrapment of anions/anionic associations within neutral non-cooperative self- assemblies**

Utsab Manna and Gopal Das \*

*Department of Chemistry, Indian Institute of Technology Guwahati,*

*Assam-781039, India*

*E-mail: [gdas@iitg.ernet.in](mailto:gdas@iitg.ernet.in)*

## Characterization of free receptors $L_1$ and $L_2$ :

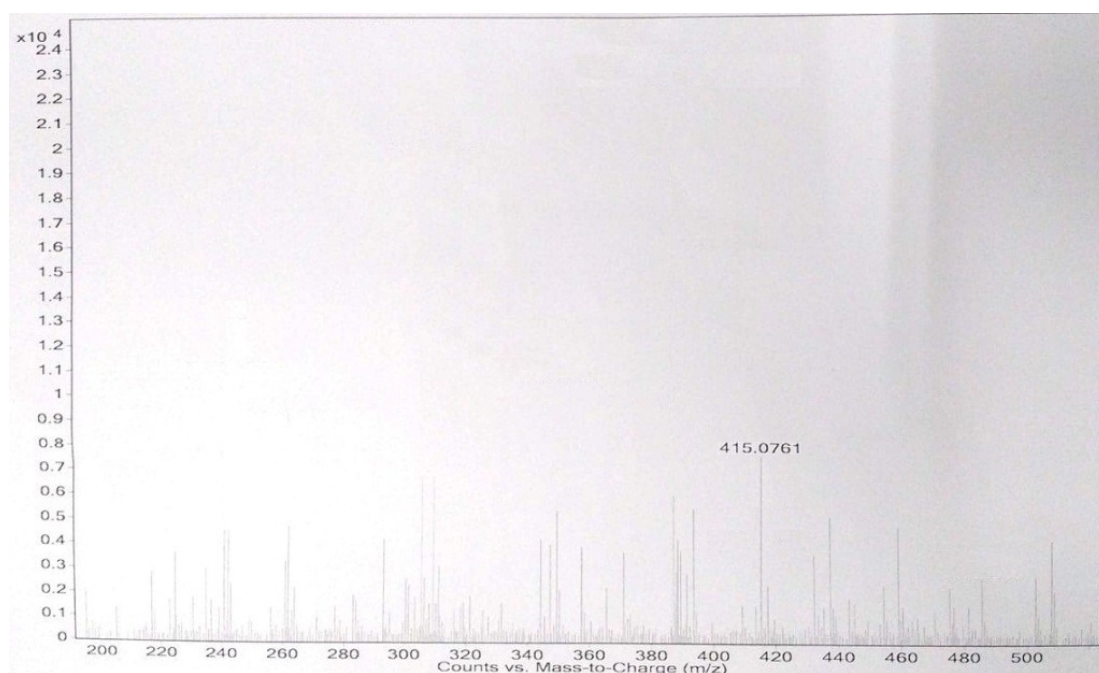

**Figure S1:** ESI-Mass spectrum of *para*-chlorophenyl functionalized *para*-phenylenediamine based bis-urea receptor  $L_1$ .

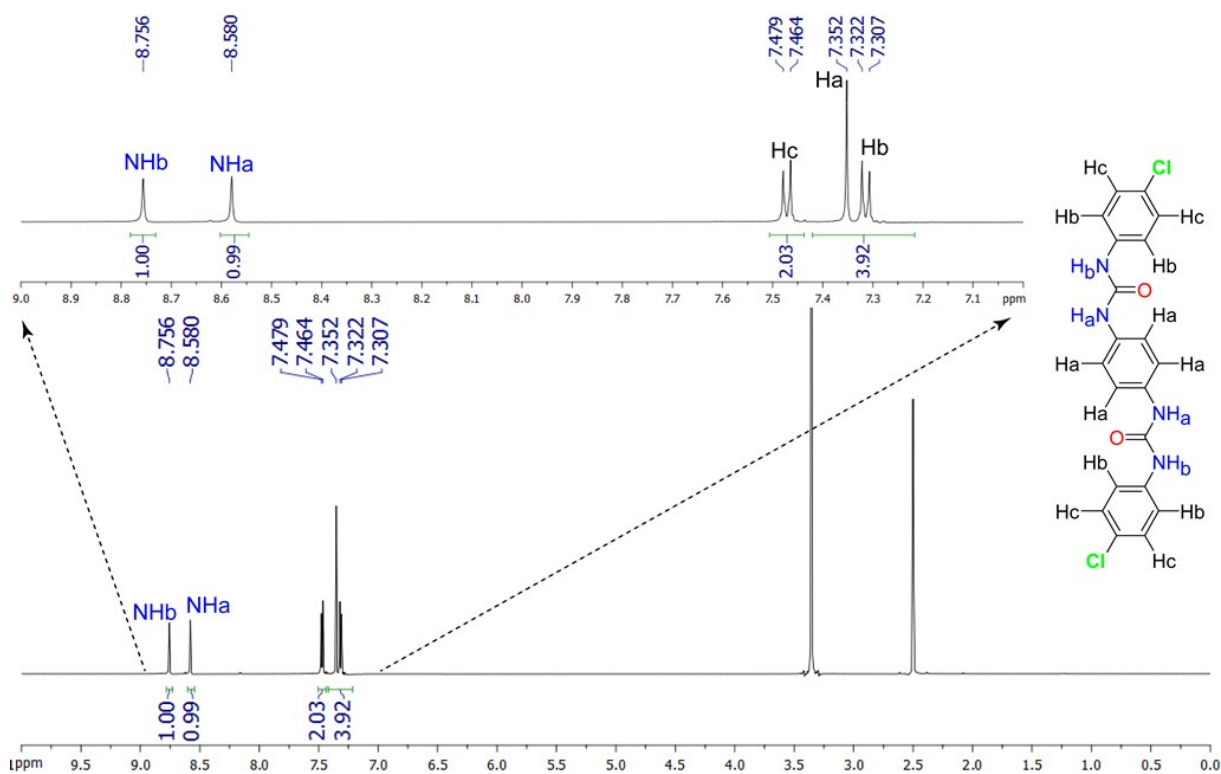

**Figure S2:** Integrated  $^1H$ -NMR spectrum (full as well as expanded) and interpretation of all hydrogen atoms of free dipodal bis-urea *para*-chloro isomer  $L_1$  in  $DMSO-d_6$  at  $25^\circ C$ .

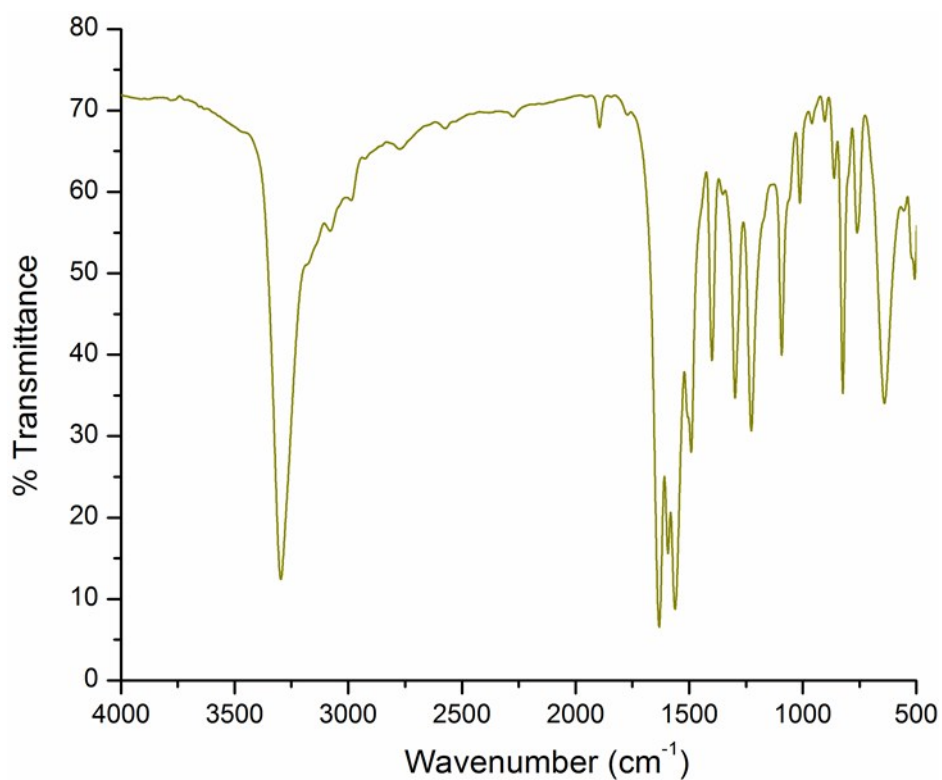

**Figure S3:** FT-IR spectrum of **L<sub>1</sub>** recorded in KBr pellet.

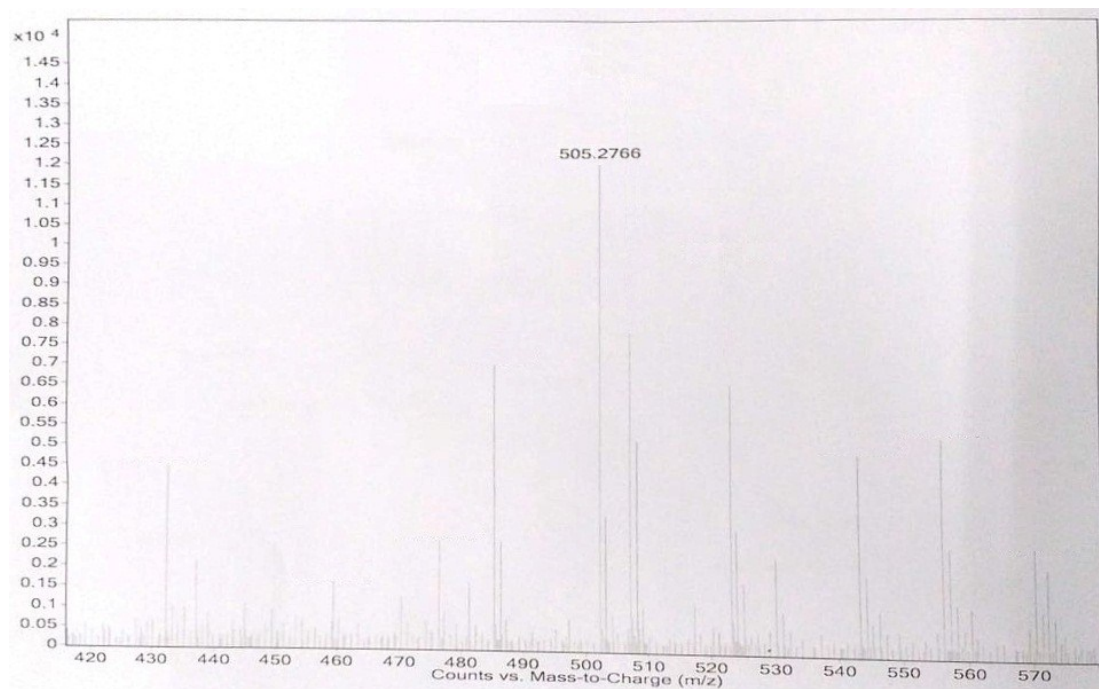

**Figure S4:** ESI-Mass spectrum of *para*-bromophenyl functionalized *para*-phenylenediamine based bis-urea receptor **L<sub>2</sub>**.

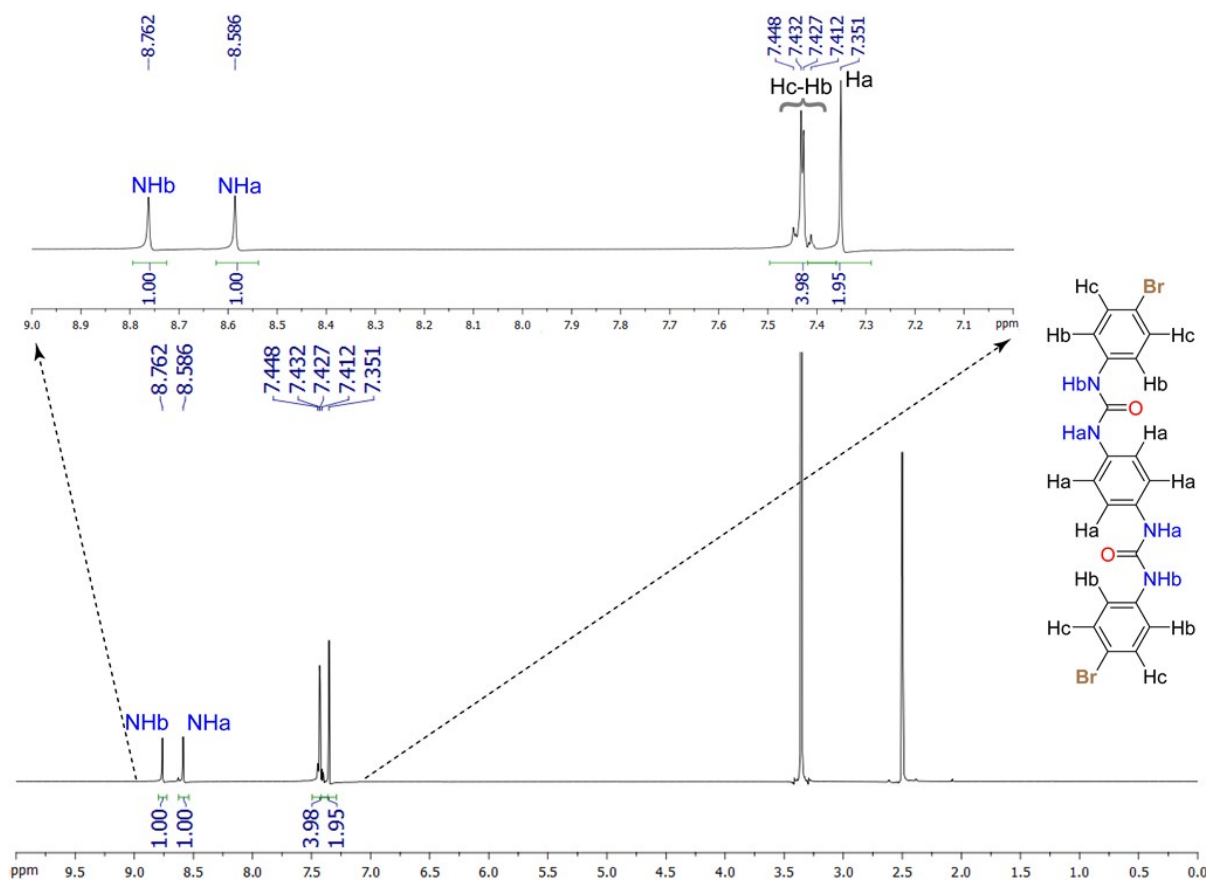

**Figure S5:** Integrated  $^1\text{H}$ -NMR spectrum (full as well as expanded) and interpretation of all hydrogen atoms of free dipodal bis-urea *para*-bromoisomer  $\text{L}_2$  in  $\text{DMSO-d}_6$  at  $25^\circ\text{C}$ .

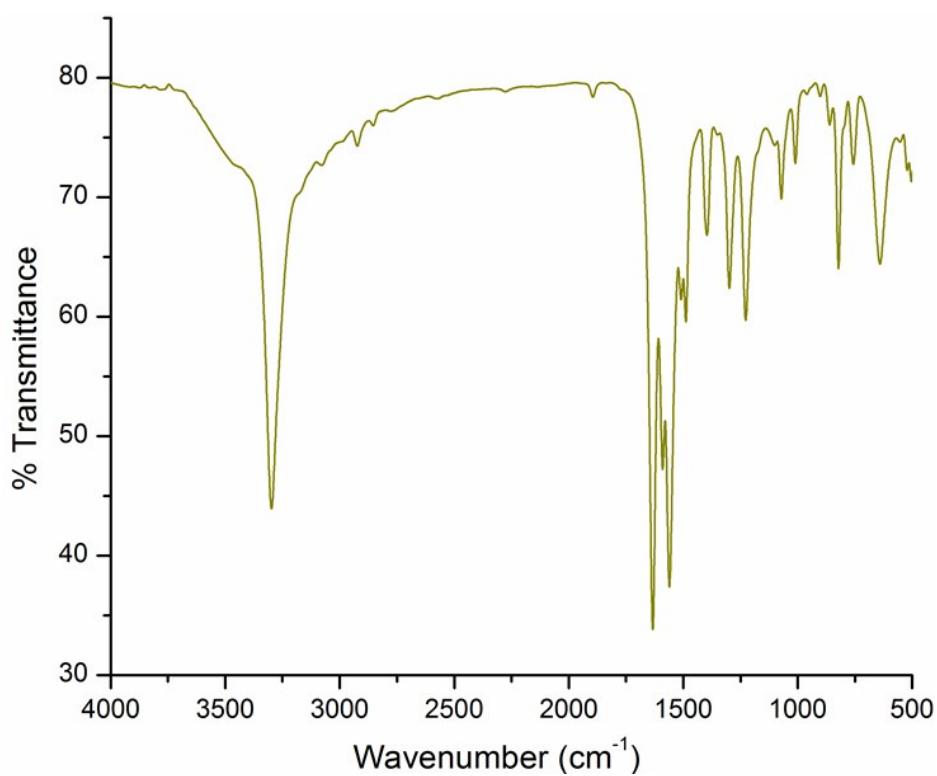

**Figure S6:** FT-IR spectrum of  $\text{L}_2$  recorded in KBr pellet.

**Characterization of neutral anion complexes of receptors:**

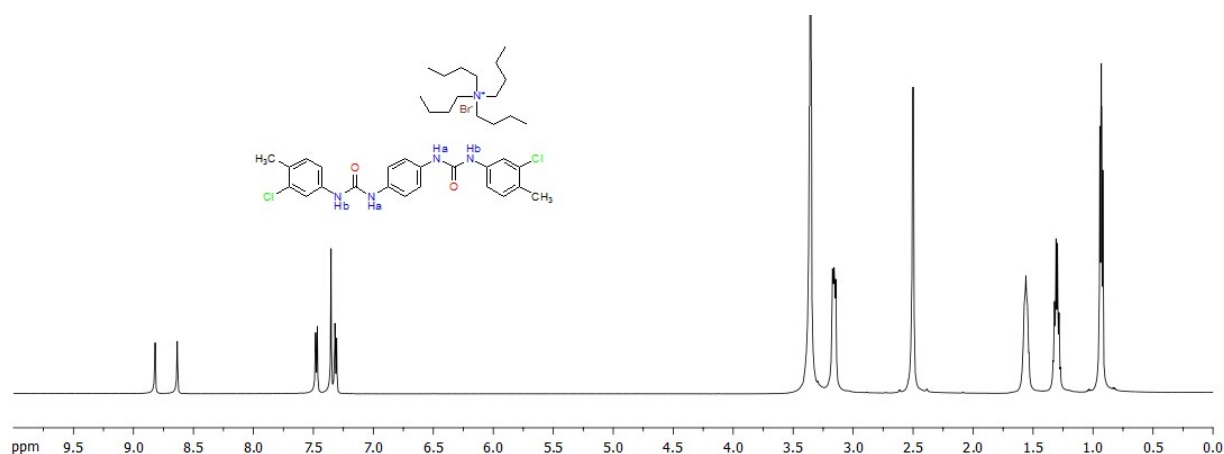

**Figure S7:**  $^1\text{H}$  NMR full and expanded spectrum of bromide complex **1a** of **L<sub>1</sub>** as recorded in  $\text{DMSO-}d_6$  at 298 K.

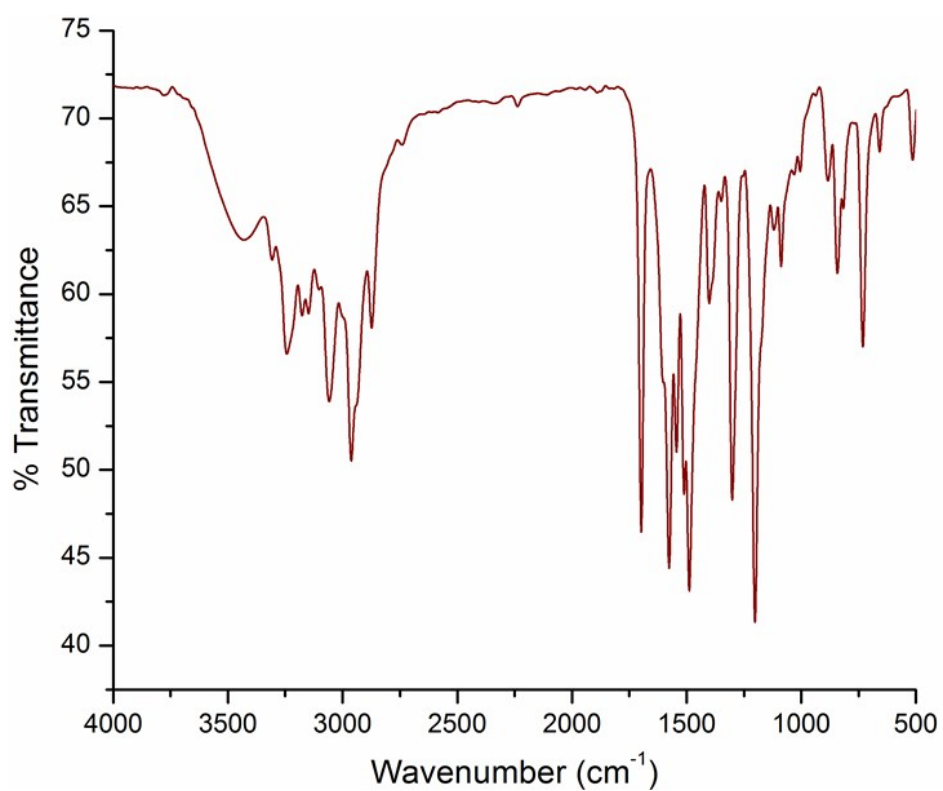

**Figure S8:** FT-IR spectrum of complex **1a** of **L<sub>1</sub>** recorded in KBr pellet.

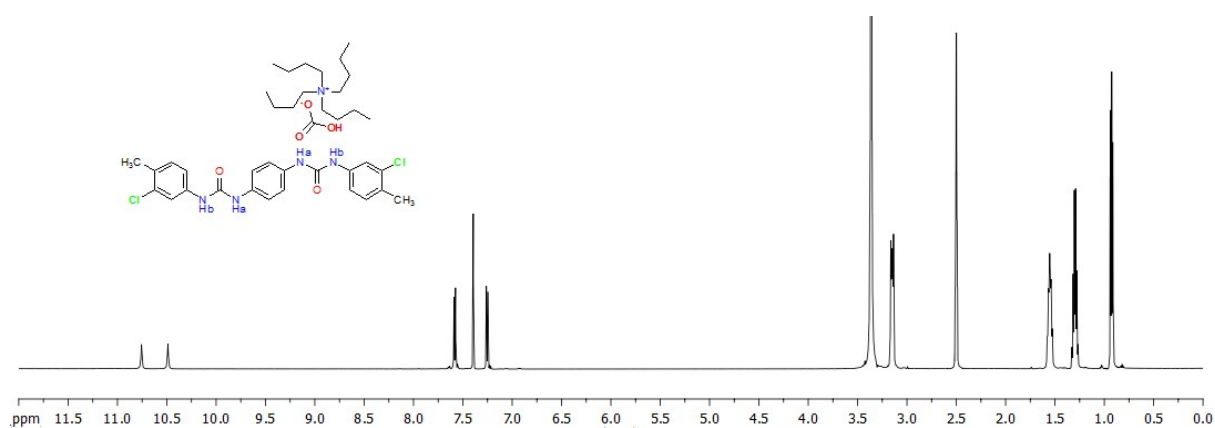

**Figure S9:**  $^1\text{H}$  NMR full and expanded spectrum of hydroxide induced hydrogencarbonate dimer entrapped complex **1b** of **L<sub>1</sub>** as recorded in  $\text{DMSO-}d_6$  at 298 K.

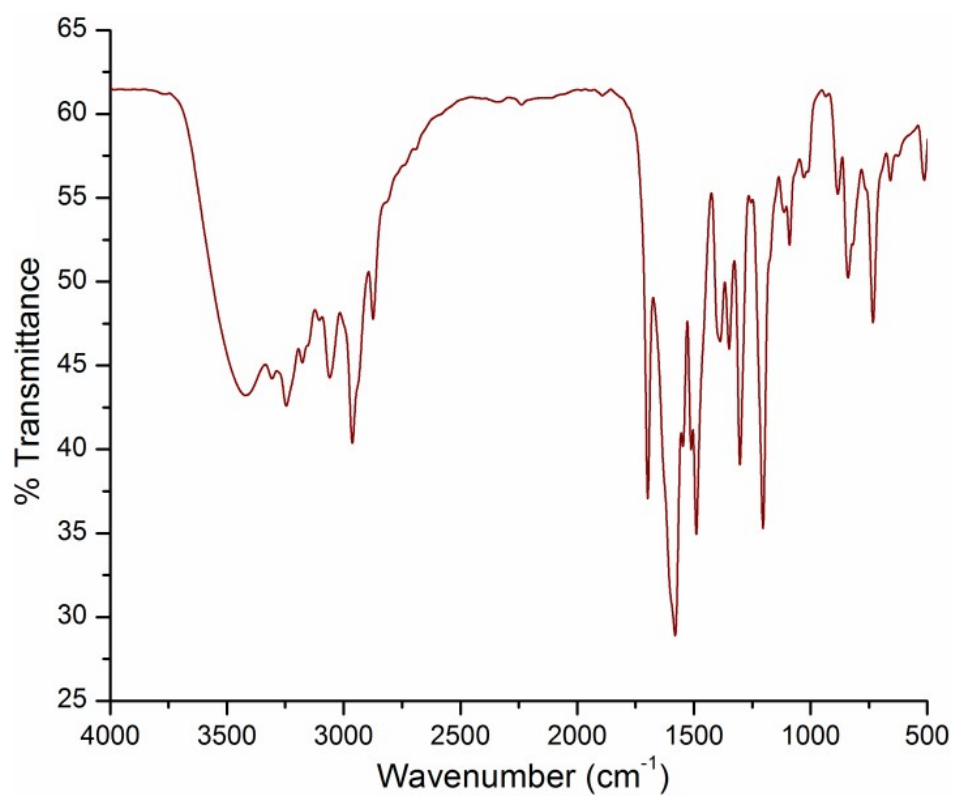

**Figure S10:** FT-IR spectrum of complex **1b** of **L<sub>1</sub>** recorded in KBr pellet.

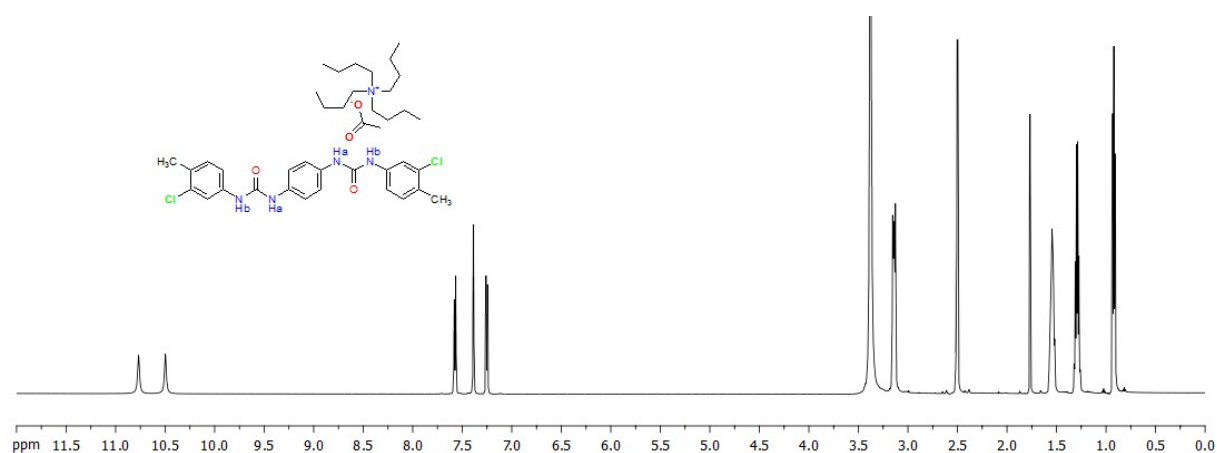

**Figure S11:**  $^1\text{H}$  NMR full and expanded spectrum of acetate entrapped complex **1c** of **L<sub>1</sub>** as recorded in  $\text{DMSO-}d_6$  at 298 K.

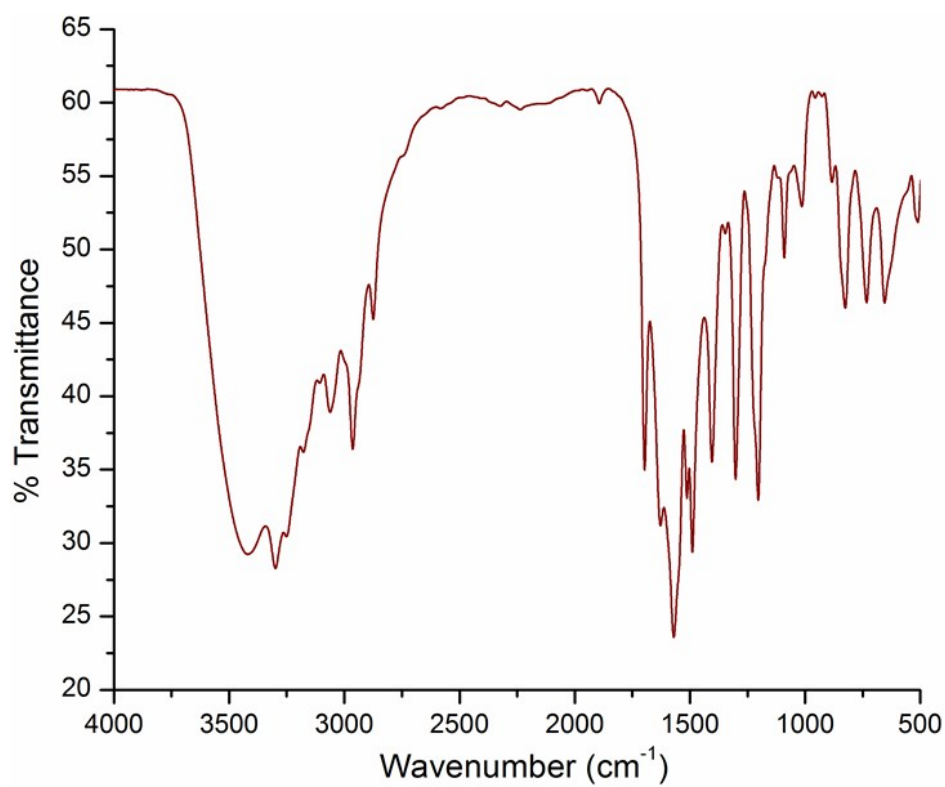

**Figure S12:** FT-IR spectrum of complex **1c** of **L<sub>1</sub>** recorded in KBr pellet.



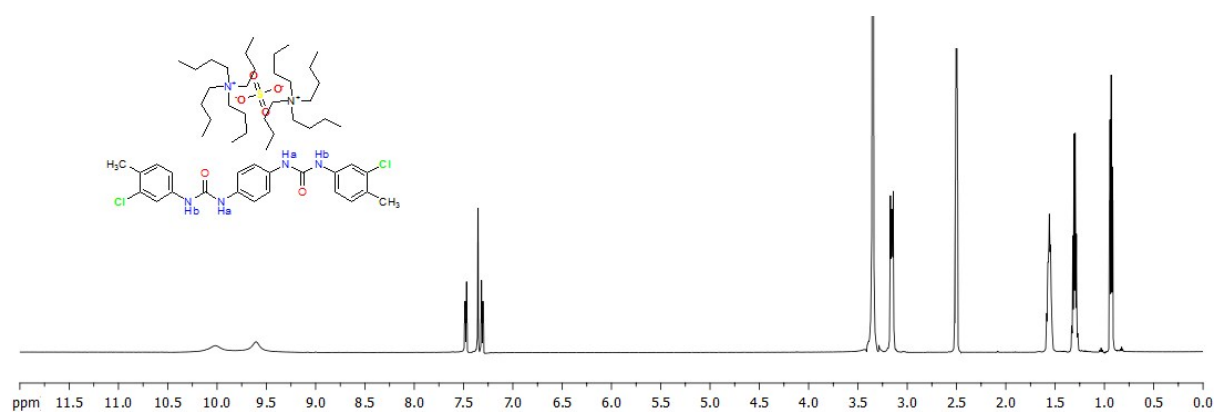

**Figure S13:**  $^1\text{H}$  NMR full and expanded spectrum of divalent sulphate complex **1d** of **L<sub>1</sub>** as recorded in  $\text{DMSO-}d_6$  at 298 K.

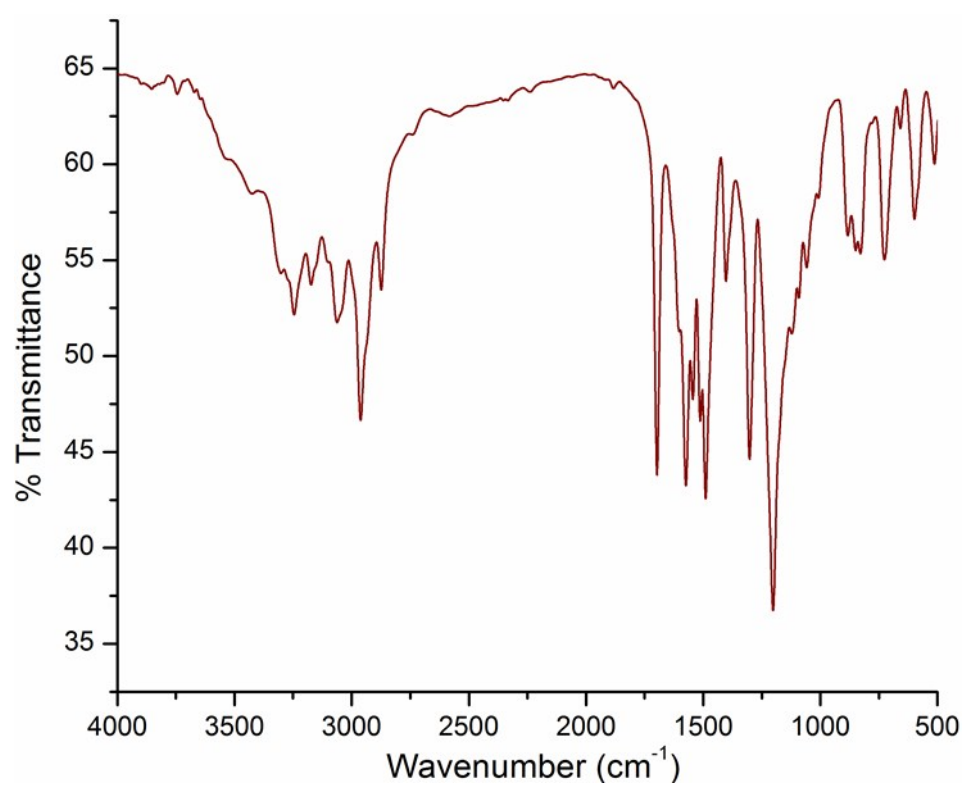

**Figure S14:** FT-IR spectrum of complex **1d** of **L<sub>1</sub>** recorded in KBr pellet.



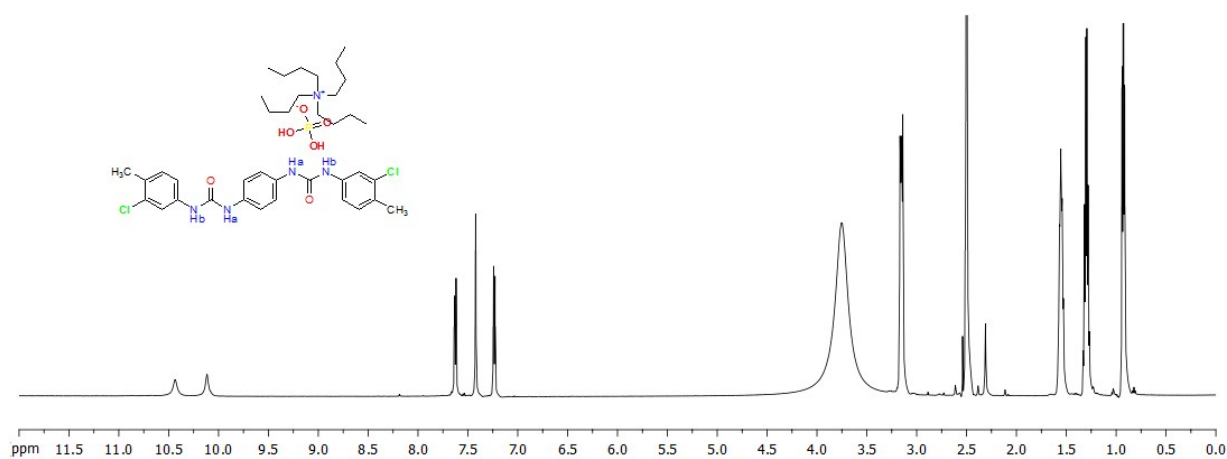

**Figure S15:**  $^1\text{H}$  NMR full and expanded spectrum of dihydrogenphosphate polymer trapped complex **1e** of **L<sub>1</sub>** as recorded in  $\text{DMSO-}d_6$  at 298 K.

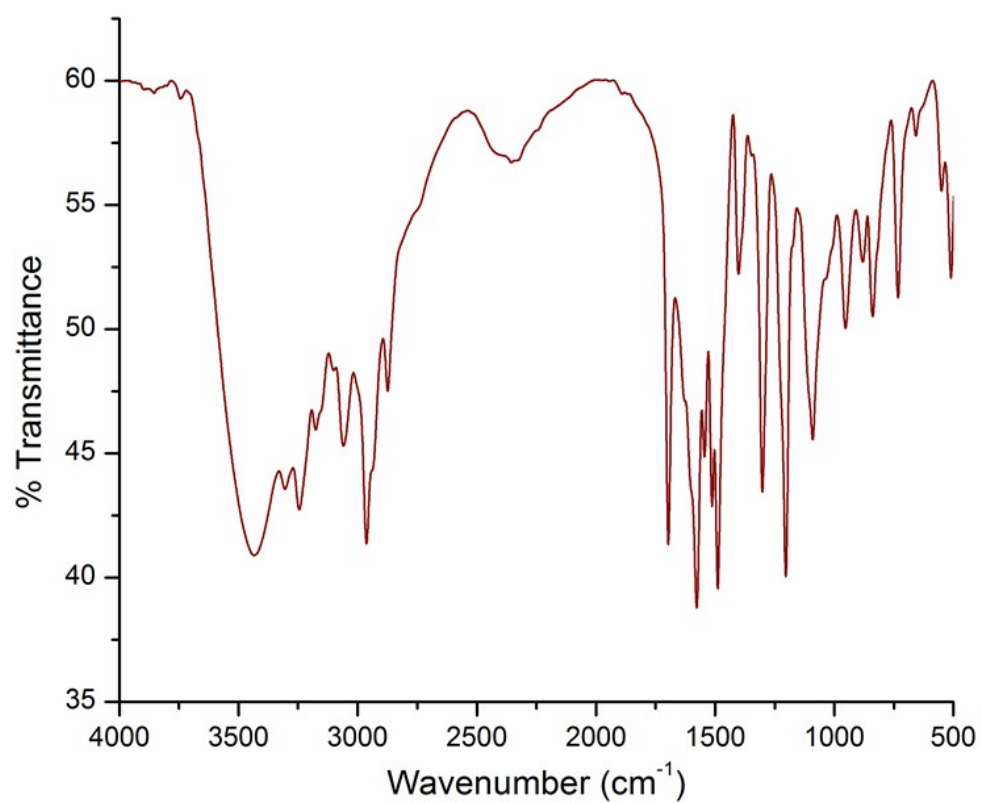

**Figure S16:** FT-IR spectrum of complex **1e** of **L<sub>1</sub>** recorded in KBr pellet.

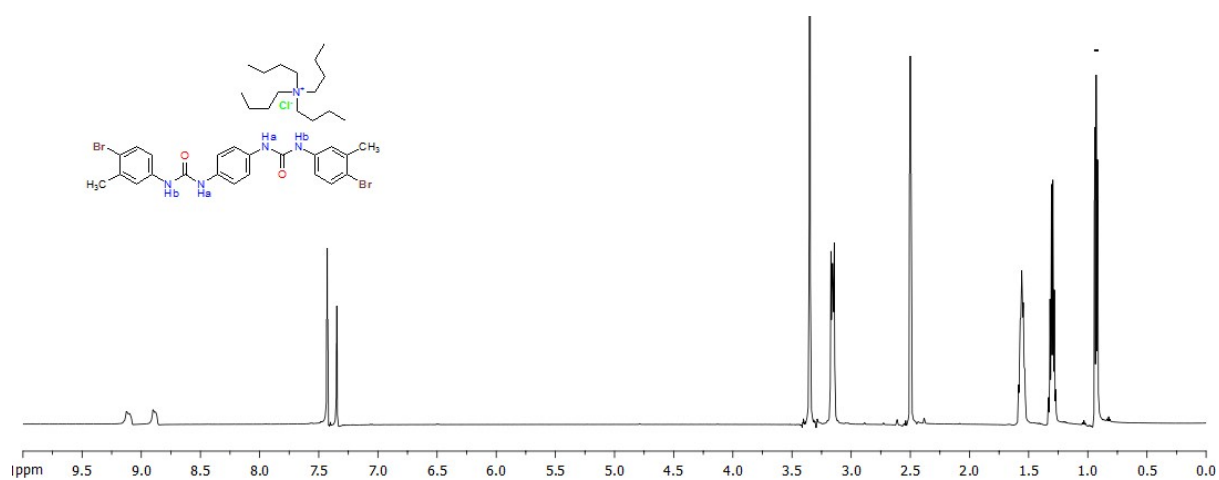

**Figure S17:**  $^1\text{H}$  NMR full and expanded spectrum of chloride complex **2a** of **L<sub>2</sub>** as recorded in  $\text{DMSO-}d_6$  at 298 K.

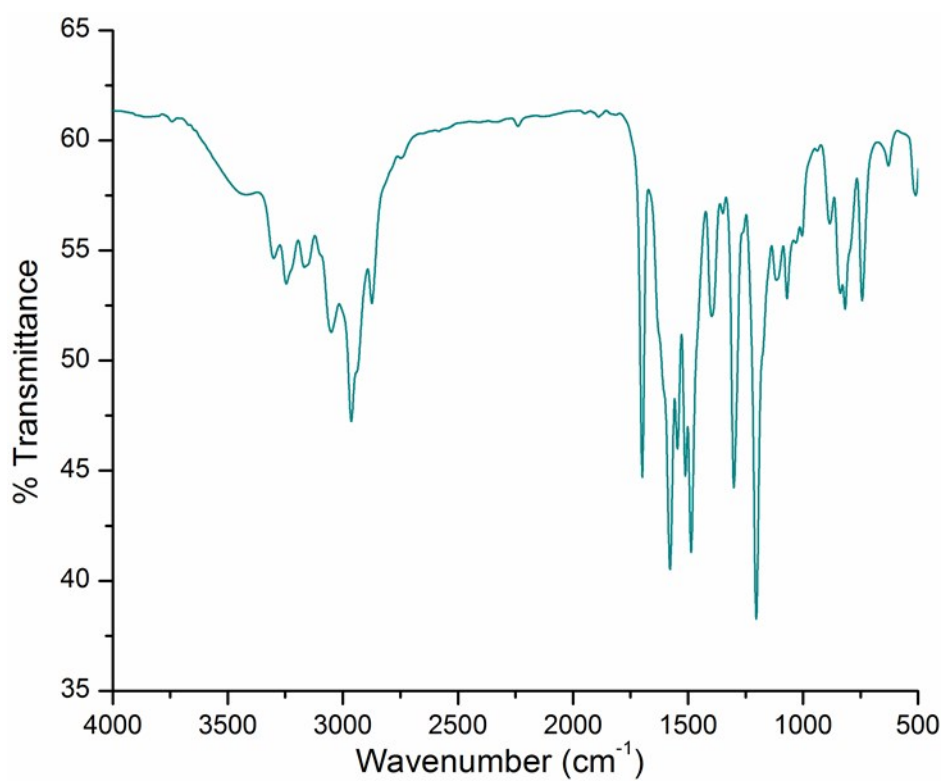

**Figure S18:** FT-IR spectrum hydrated-acetate complex **2a** of **L<sub>2</sub>** recorded in KBr pellet.

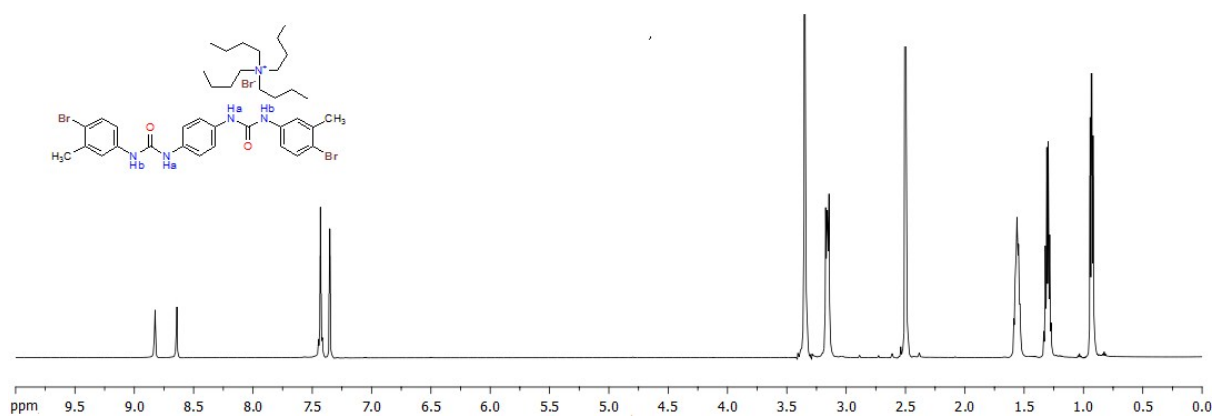

**Figure S19:** <sup>1</sup>H NMR full and expanded spectrum of bromide entrapped complex **2b** of **L<sub>2</sub>** as recorded in DMSO-*d*<sub>6</sub> at 298 K.

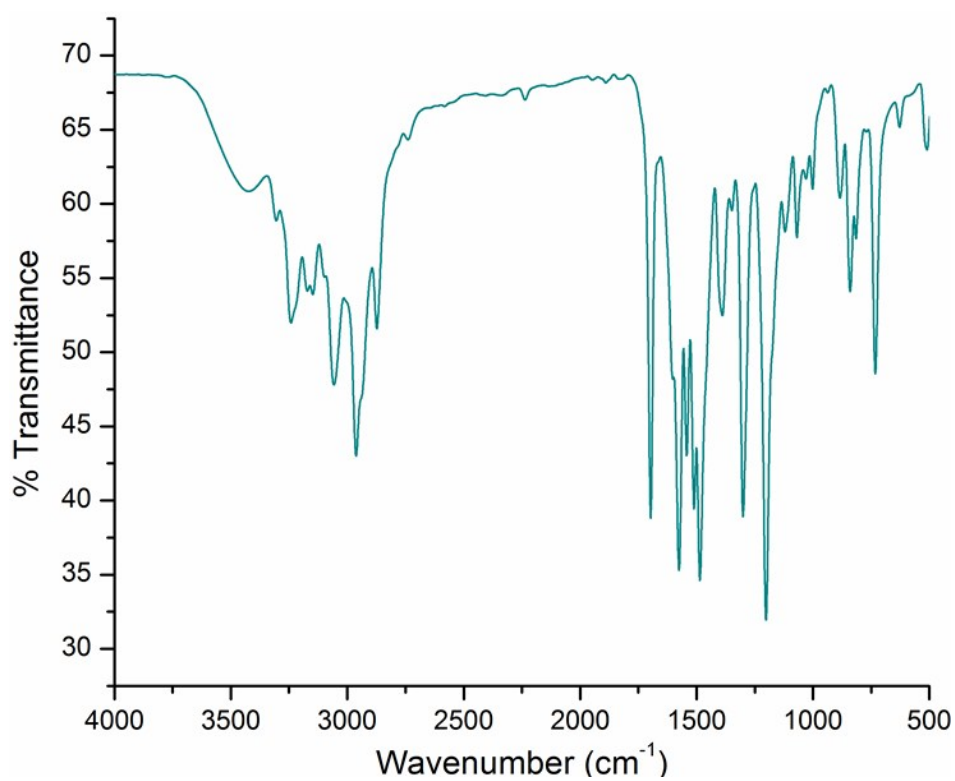

**Figure S20:** FT-IR spectrum of complex **2b** of **L<sub>2</sub>** recorded in KBr pellet.

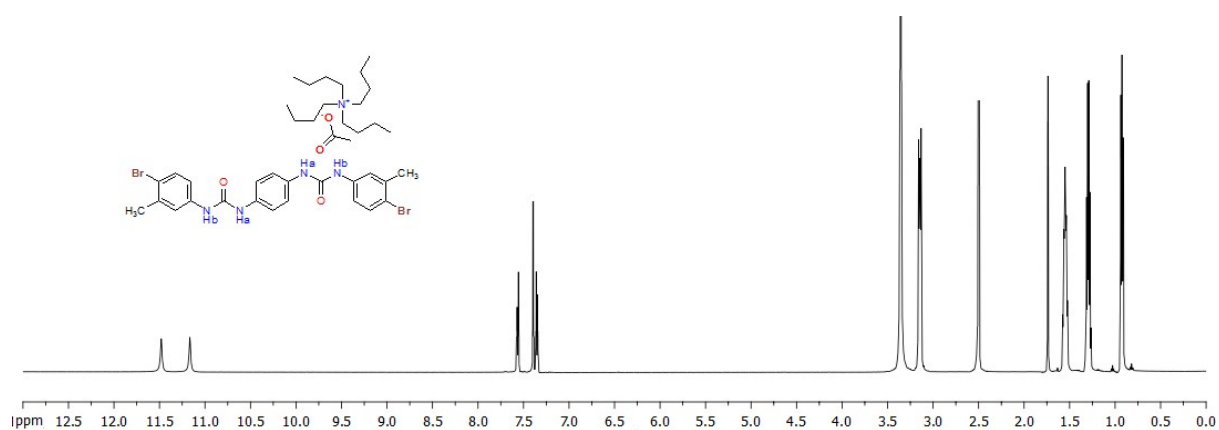

**Figure S21:**  $^1\text{H}$  NMR full and expanded spectrum of acetate entrapped complex **2c** of **L<sub>2</sub>** as recorded in  $\text{DMSO-}d_6$  at 298 K.

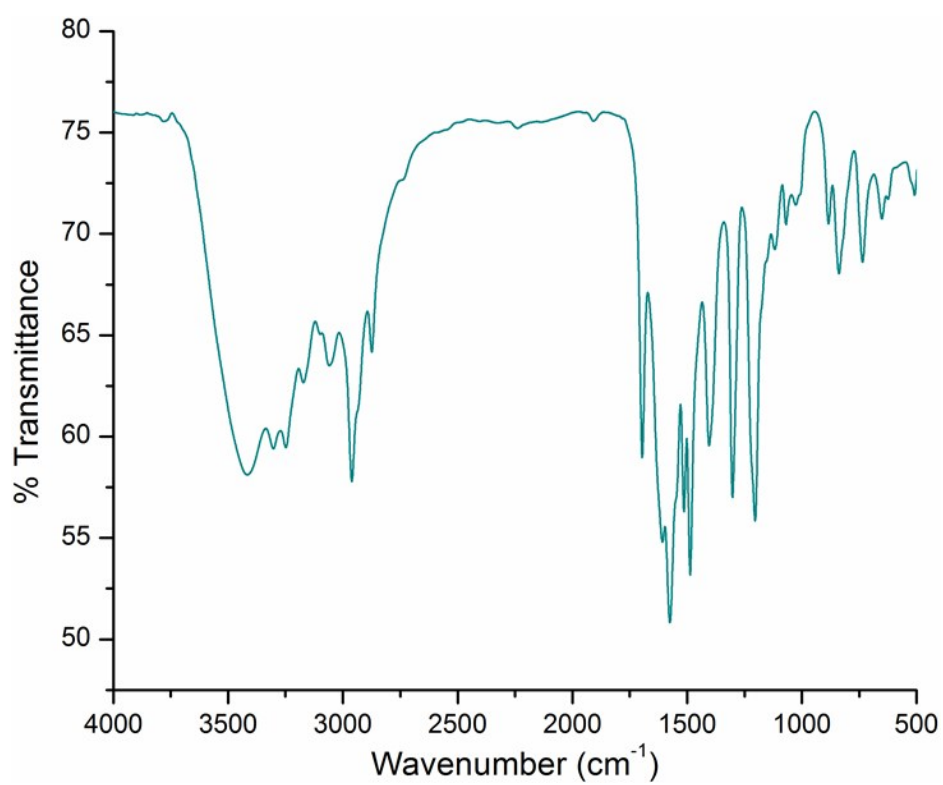

**Figure S22:** FT-IR spectrum of complex **2c** of **L<sub>2</sub>** recorded in KBr pellet.

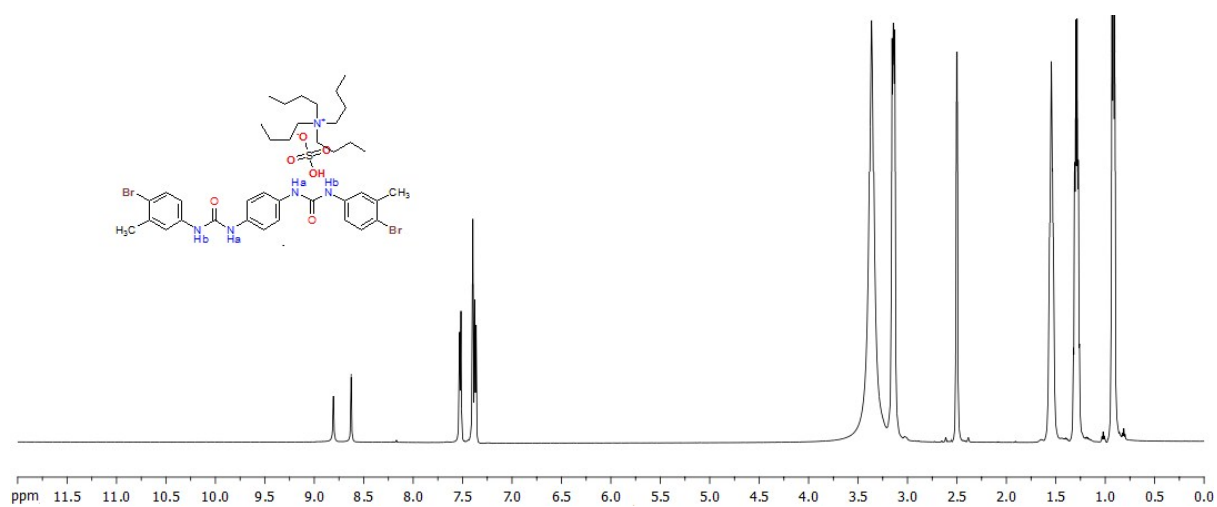

**Figure S23:**  $^1\text{H}$  NMR full and expanded spectrum of hydrogensulphate dimer entrapped complex **2d** of **L<sub>2</sub>** as recorded in  $\text{DMSO-}d_6$  at 298 K.

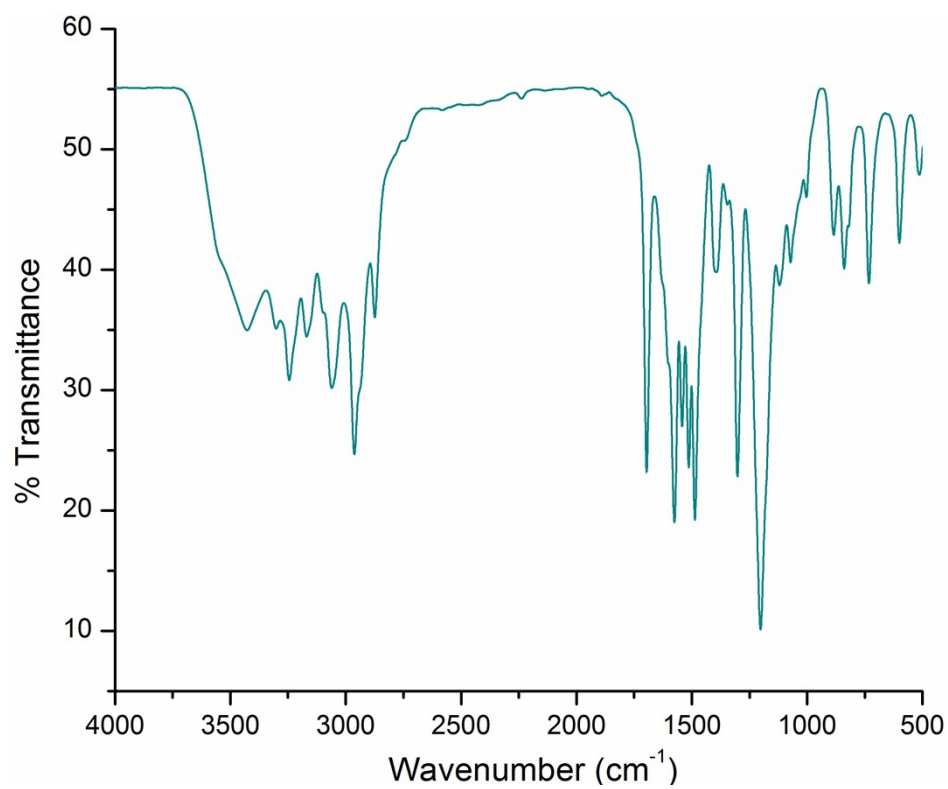

**Figure S24:** FT-IR spectrum of complex **2d** of **L<sub>2</sub>** recorded in KBr pellet.

**Table S1.** Hydrogen bonding distances (Å) and Bond angles (°) in the neutral anion-receptor complexes:

| Ligand/Complex | D–H···A      | <i>d</i> (D···H)/Å | <i>d</i> (H···A)/Å | <i>d</i> (D···A)/Å | <D–H···A/° | Symmetry codes     |
|----------------|--------------|--------------------|--------------------|--------------------|------------|--------------------|
| <b>1a</b>      | N1–H1N···Br1 | 0.86               | 2.52               | 3.351(5)           | 162        | 1/2-x,-1/2+y,1/2-z |
|                | N2–H2N···Br1 | 0.86               | 2.50               | 3.332(4)           | 163        | 1/2-x,-1/2+y,1/2-z |
| <b>1b</b>      | N1–H1N···O2  | 0.86               | 1.93               | 2.76(13)           | 164        | x,y,z              |
|                | N2–H2N···O3  | 0.86               | 2.00               | 2.83(13)           | 165        | x,y,z              |
|                | O4–H4O···O3  | 0.82               | 1.83               | 2.64(13)           | 169        | 1-x,1-y,-z         |
| <b>1c</b>      | N1–H1N···O3  | 0.86               | 2.00               | 2.834(4)           | 163        | x,y,z              |
|                | N2–H2N···O4  | 0.86               | 1.93               | 2.776(4)           | 166        | x,y,z              |
|                | N3–H3N···O5  | 0.86               | 1.97               | 2.785(4)           | 158        | 1-x,-1/2+y,1/2-z   |
|                | N4–H4N···O6  | 0.86               | 1.96               | 2.809(4)           | 167        | 1-x,-1/2+y,1/2-z   |
| <b>1d</b>      | N1–H1N···O4  | 0.86               | 2.00               | 2.833(7)           | 162        | x,y,z              |
|                | N1–H1N···O6  | 0.86               | 2.06               | 2.854(7)           | 154        | x,y,z              |
|                | N2–H2N···O4  | 0.86               | 2.58               | 3.248(6)           | 135        | x,y,z              |
|                | N2–H2N···O5  | 0.86               | 2.17               | 2.927(6)           | 147        | x,y,z              |
|                | N2–H2N···O3  | 0.86               | 1.95               | 2.765(5)           | 159        | 1-x,-y,1-z         |
|                | N3–H3N···O6  | 0.86               | 2.54               | 3.299(6)           | 148        | 1-x,1/2+y,1/2-z    |
|                | N3–H3N···O3  | 0.86               | 2.00               | 2.798(5)           | 154        | x,1/2-y,-1/2+z     |
|                | N3–H3N···O4  | 0.86               | 2.29               | 3.051(6)           | 148        | x,1/2-y,-1/2+z     |
|                | N3–H3N···O5  | 0.86               | 2.51               | 3.233(6)           | 142        | x,1/2-y,-1/2+z     |
|                | N4–H4N···O6  | 0.86               | 2.03               | 2.828(6)           | 153        | 1-x,1/2+y,1/2-z    |
|                | N4–H4N···O5  | 0.86               | 2.00               | 2.835(6)           | 163        | x,1/2-y,-1/2+z     |
| <b>1e</b>      | N1–H1N···O5  | 0.86               | 2.13               | 2.923(4)           | 153        | x,y,z              |
|                | N2–H2N···O4  | 0.86               | 2.01               | 2.833(4)           | 161        | x,y,z              |
|                | O2–H2O···O5  | 0.82               | 1.75               | 2.549(4)           | 164        | 1-x,-y,1-z         |
|                | O3–H3O···O4  | 0.82               | 1.76               | 2.558(4)           | 166        | -x,-y,1-z          |
| <b>2a</b>      | N1–H1N···Cl1 | 0.86               | 2.35               | 3.181(6)           | 161        | 3/2-x,1/2+y,1/2-z  |
|                | N2–H2N···Cl1 | 0.86               | 2.35               | 3.181(6)           | 162        | 3/2-x,1/2+y,1/2-z  |
| <b>2b</b>      | N1–H1N···Br2 | 0.86               | 2.52               | 3.352(6)           | 163        | 1/2-x,-1/2+y,1/2-z |
|                | N2–H2N···Br2 | 0.86               | 2.49               | 3.319(6)           | 163        | 1/2-x,-1/2+y,1/2-z |
| <b>2c</b>      | N1–H1N···O3  | 0.86               | 1.97               | 2.809(7)           | 164        | x,y,z              |
|                | N2–H2N···O4  | 0.86               | 1.92               | 2.766(7)           | 166        | x,y,z              |
|                | N3–H3N···O6  | 0.86               | 1.96               | 2.778(7)           | 158        | 1+x,y,z            |
|                | N4–H4N···O5  | 0.86               | 1.97               | 2.812(7)           | 166        | 1+x,y,z            |
| <b>2d</b>      | N1–H1N···O10 | 0.86               | 2.04               | 2.902(7)           | 175        | x,y,z              |
|                | N2–H2N···O11 | 0.86               | 2.15               | 2.992(7)           | 166        | x,y,z              |
|                | O8–H8···O11  | 0.82               | 1.83               | 2.646(6)           | 172        | 1-x,1-y,1-z        |

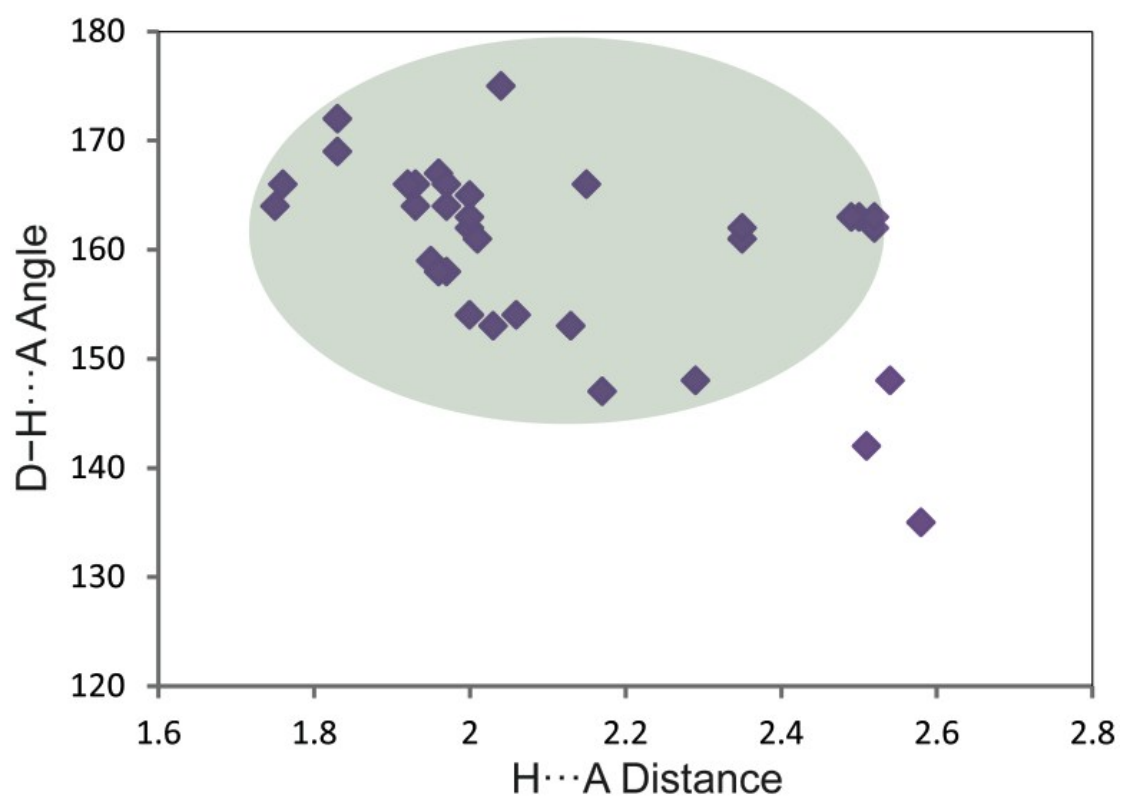

**Figure S25.** The scatter plot of D–H···A angles vs. H···A distances of the hydrogen bonds in neutral halide and oxyanion complexes **1a–1e**, **2a–2d** of receptors **L<sub>1</sub>** and **L<sub>2</sub>** and encircled area in the plot representing most of the interactions are present in strong hydrogen-bonding regions.
